# Supplementary material for: Gut Biogeography Accentuates Sex-Related Differences in the Murine Microbiome
Source: MDPI journal article supplement (doi:10.3390/microorganisms12010221), 2024-01-22
Supplement: s1 [file s1]

## Supplementary Figures

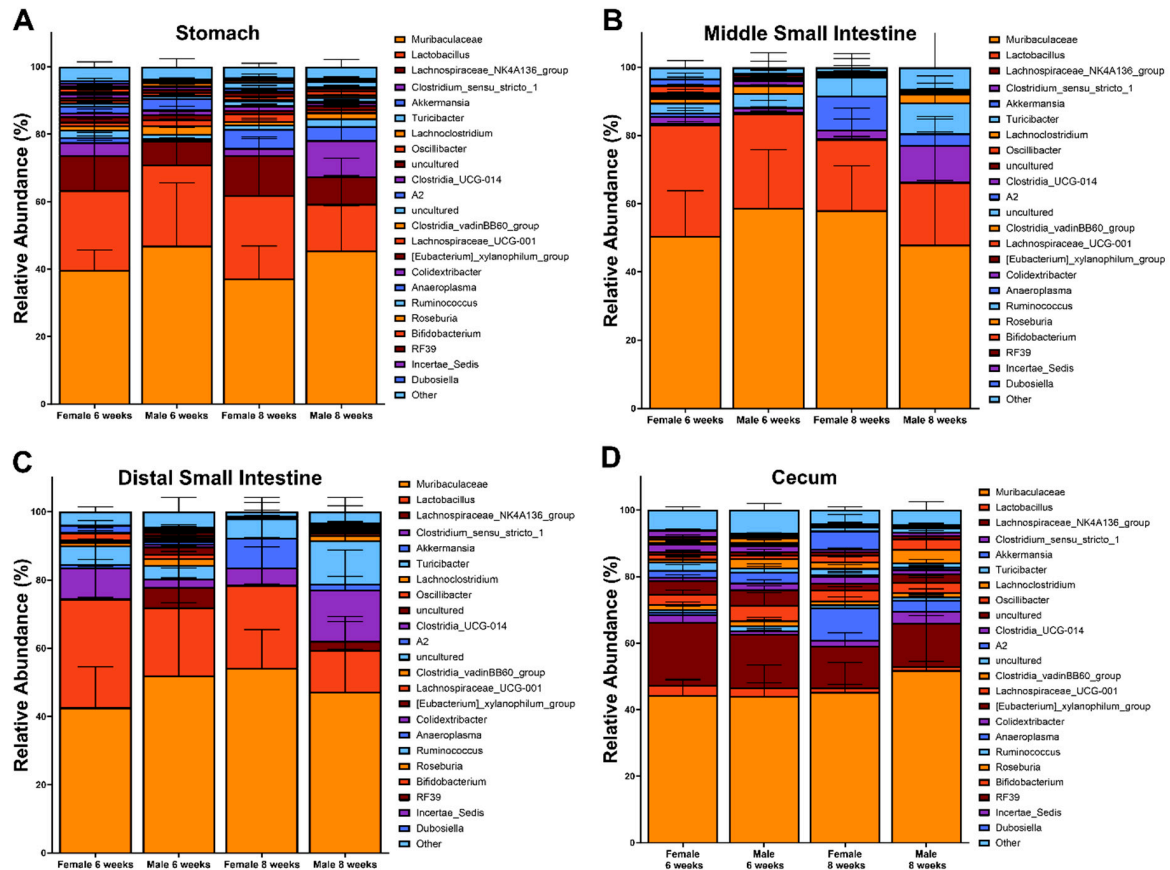

**Supplementary Figure S1:** Relative abundance plots per GI region for female and male mice at 6 and 8 weeks of age. A) Stomach, B) middle small intestine, C) distal small intestine, and D) cecum.

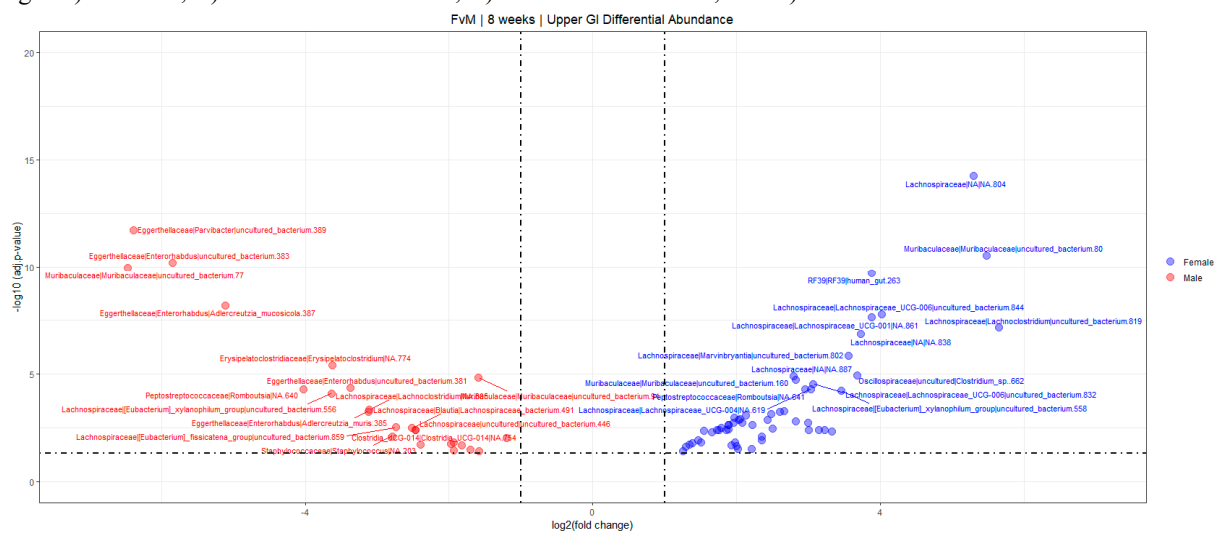

**Supplementary Figure S2:** Differential abundance DESeq2 plot between female and male mice in the upper GI at 8 weeks of age.
